# Supplementary material for: High specific capacitance of CuS nanotubes in redox active polysulfide electrolyte
Source: Royal Society of Chemistry journal article supplement (doi:10.1039/c2ra22257d), 2012-12-07
Supplement: c2ra22257d.pdf [file c2ra22257d.pdf]

## High specific capacitance of CuS nanotubes in redox active

### polysulfide electrolyte

Lei Qian<sup>a</sup>, Xianqing Tian<sup>a</sup>, Li Yang<sup>a</sup>, Jianfei Mao<sup>a</sup>, Hongyan Yuan<sup>b</sup>, Dan Xiao<sup>a,b\*</sup>

<sup>a</sup>College of Chemistry and <sup>b</sup>College of Chemical Engineering, Sichuan University, 29 Wangjiang Road, Chengdu 610064, PR China.

\* Corresponding authors. Fax: +86-28-85416029; Tel: +86-28-85415029; E-mail address: [xiaodan@scu.edu.cn](mailto:xiaodan@scu.edu.cn)

### Supporting information

#### *Synthesis of [Cu(tu)]Cl·1/2H<sub>2</sub>O nanowires precursor and CuS NTs*

[Cu(tu)]Cl·1/2H<sub>2</sub>O nanowires precursor were prepared by a simple solution methods.

The typical procedures are as follows. 50 ml 0.1 M CuCl<sub>2</sub> solution were mixed with 50 ml 0.2 M tu (tu = thiourea) without stirring. The white nanowires formed in one minute. After reacted at room temperature for about one hour, the white [Cu(tu)]Cl·1/2H<sub>2</sub>O nanowires precursor were filtrated and washed with double distilled water (saturated with N<sub>2</sub>) and absolute ethanol for several times. Then the white [Cu(tu)]Cl·1/2H<sub>2</sub>O nanowires precursor were transferred to a 500 ml beaker and diluted with double distilled water, followed by addition of 0.1 M NaOH solution under gentle agitation to adjust the pH of solution to 9. The solution allowed to stand for several hours in atmosphere. Finally black CuS NTs were washed with water and absolute ethanol several times and dried at 90 °C.

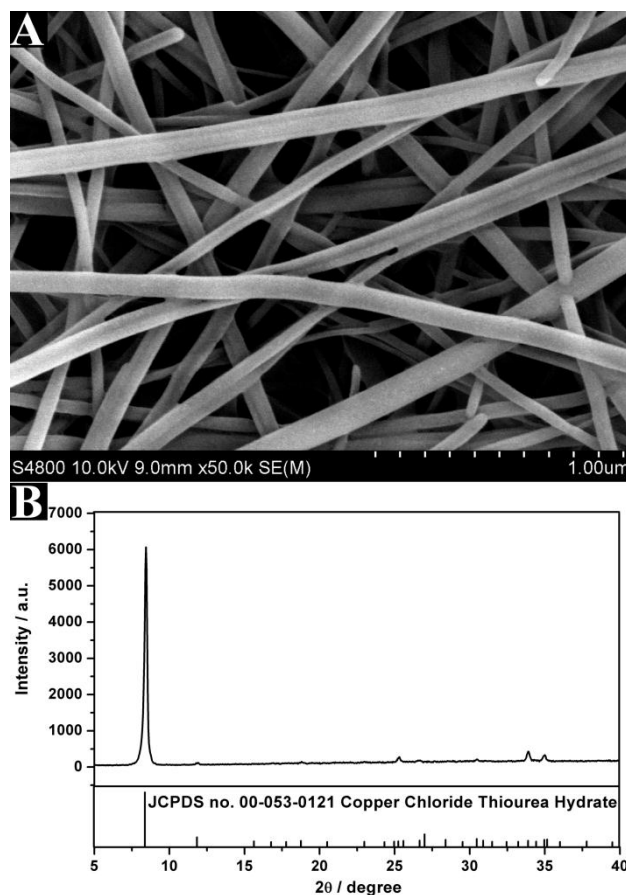

Fig. S1 SEM (A) and XRD (B) images of  $[\text{Cu}(\text{tu})]\text{Cl}\cdot\frac{1}{2}\text{H}_2\text{O}$  nanowires precursor

### *Preparation of CuS NTs electrode*

CuS NTs electrode used for electrochemical measurements was prepared as follows. CuS NTs, acetylene black as conducting materials and poly(vinylidene fluoride) as binder were mix in a weight ratio of 85:10:5 to yield a paste, N-Methyl-2-pyrrolidone (NMP) was used as the solvent. The paste was load in Ni foam electrode and dried at 80 °C before use. The mass loading was between 3-5  $\text{mg}/\text{cm}^2$ .

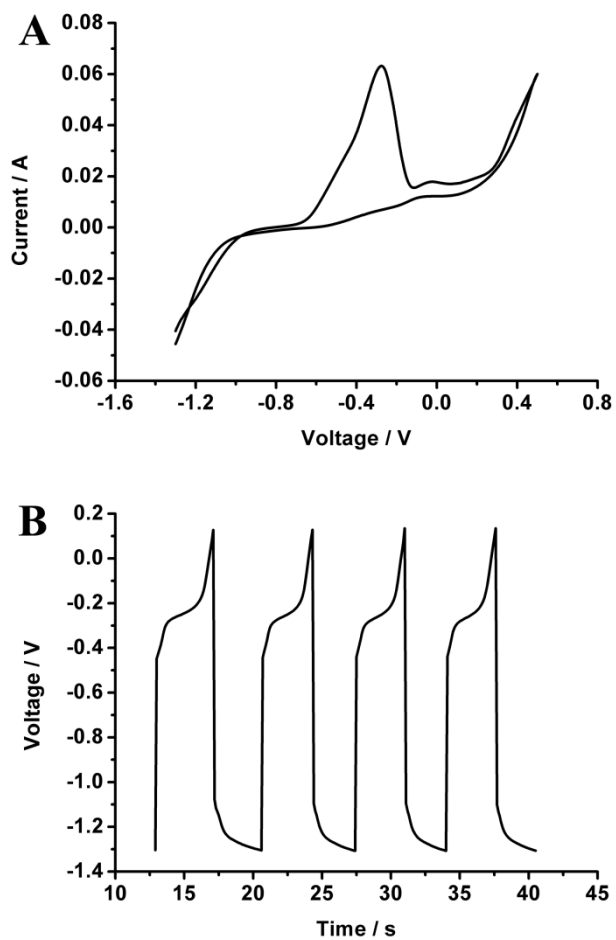

Fig. S2 CV curve ( scan rate of  $10 \text{ mV s}^{-1}$ ) and charge-discharge curve ( current density of  $15 \text{ A/g}$ ) of Ni foam in polysulfide electrolyte
